# Supplementary material for: Polyanionic and polyzwitterionic azobenzene ionic liquid-functionalized silica materials and their chromatographic applications
Source: Royal Society of Chemistry journal article supplement (doi:10.1039/c3cc00138e), 2013-01-01
Supplement: c3cc00138e.pdf [file c3cc00138e.pdf]

# Polyanionic and polyzwitterionic azobenzene ionic liquid-functionalized silica materials and their chromatographic applications

Hongdeng Qiu,<sup>\*,a,b</sup> Shengxiang Jiang,<sup>a</sup> Makoto Takafuji,<sup>b,c</sup> and Hirotaka Ihara<sup>\*,b,c</sup>

<sup>a</sup> Key Laboratory of Chemistry of Northwestern Plant Resources, CAS/Key Laboratory for Natural Medicine of Gansu Province, Lanzhou Institute of Chemical Physics, Chinese Academy of Science, Lanzhou 730000, China. E-mail: hdqiu@licp.cas.cn

<sup>b</sup> Department of Applied Chemistry and Biochemistry, Kumamoto University, 2-39-1 Kurokami, Kumamoto 860-8555, Japan. Fax: +81-96-342-3662; Tel: 81-96-342-3661; E-mail: ihara@kumamoto-u.ac.jp

<sup>c</sup> Kumamoto Institute for Photo-Electro Organics (Phoenix), Kumamoto 862-0901, Japan

## Characterizations:

From the elemental analysis results, sulfonic azobenzene moieties grafted onto the silica is  $0.87 \mu\text{mol m}^{-2}$  for Sil-PAzO. After cation-exchange, the bonding density is  $0.92 \mu\text{mol m}^{-2}$  for Sil-PAzO-ImC<sub>18</sub> calculated from the content of nitrogen. For Sil-P(AzO-ImC<sub>18</sub>), the bonding density of the monomer couple is  $0.84 \mu\text{mol m}^{-2}$ , which is very near to that of previous two materials. As pointed out by the reviewer,  $1 \mu\text{mol m}^{-2}$  is equivalent to 0.6 molecule or ion pair *per nm*<sup>2</sup>, so these quantities are about 0.5 groups *per nm*<sup>2</sup>. That means 1 ion pair exist in  $2 \text{ nm}^2$  on the silica surface.

In the DRIFT spectrum for the Sil-PAzO surface, obvious characteristic signals at 1601 and 1504  $\text{cm}^{-1}$  are attributed to the stretching vibration of phenyl bond of sulfonic azobenzene. Additional peaks at 2926 and 2855  $\text{cm}^{-1}$  assigned to the C–H stretching of the tetrahedral carbon were appeared for Sil-PAzO-ImC<sub>18</sub> and Sil-P(AzO-ImC<sub>18</sub>) (Fig. S3, ESI).

From the solid <sup>13</sup>C NMR, we can see that the spectra of these two IL-grafted silica materials are very similar, especially the ratio of the height between *trans* and *gauche* peaks (Fig. S4, ESI).

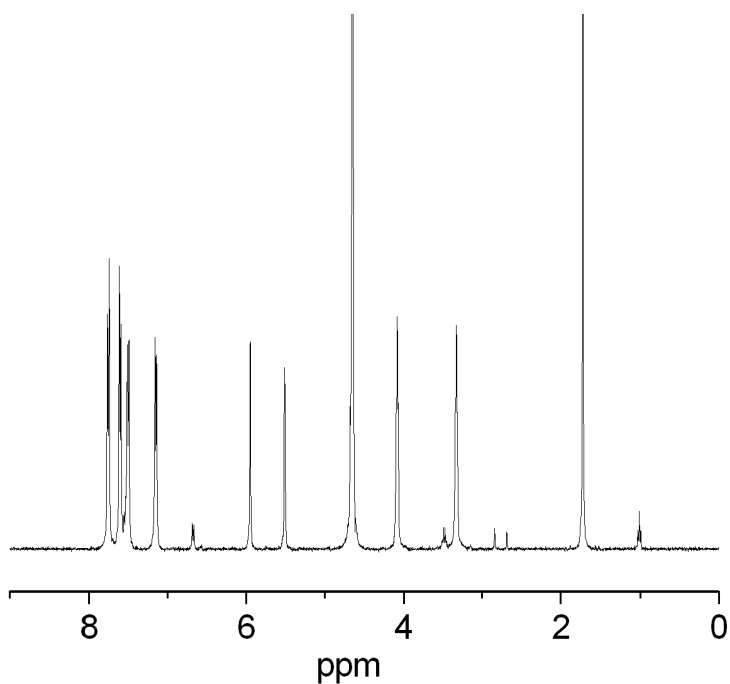

**Fig. S1**  $^1\text{H}$  NMR spectrum of MA-AzO.

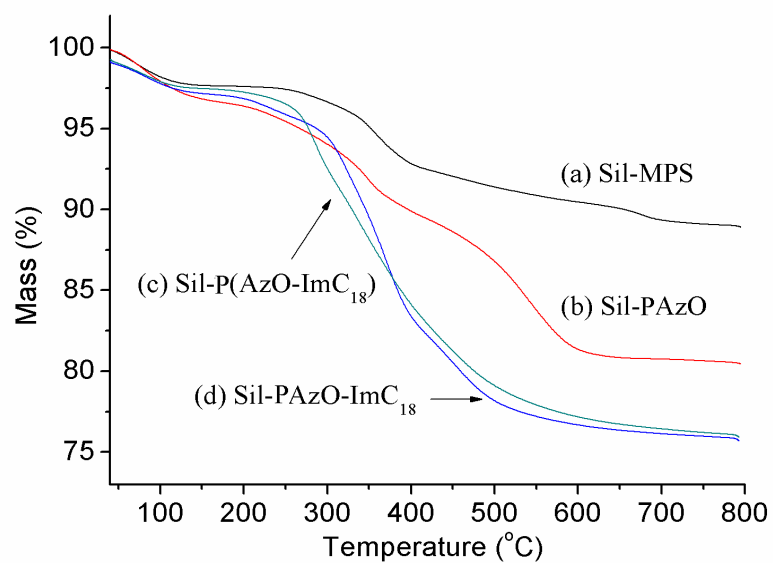

**Fig. S2** Thermogravimetric curves of Sil-MPS (a), Sil-PAzO (b), Sil-PAzO-ImC<sub>18</sub> (c), and Sil-P(AzO-ImC<sub>18</sub>) (d).

**Table S1.** Elemental analysis of Sil-MPS, Sil-PAzO, Sil-PAzO-ImC<sub>18</sub>, and Sil-P(AzO-ImC<sub>18</sub>).

| Sample                        | %C    | H%   | N%   | C/N(det.) <sup>a</sup> | C/N(cal.) <sup>b</sup> | Coverage<br>( $\mu\text{mol}/\text{m}^2$ ) |
|-------------------------------|-------|------|------|------------------------|------------------------|--------------------------------------------|
| Sil-MPS                       | 4.42  | 1.27 | -    | -                      | -                      | 4.34 (C) <sup>c</sup>                      |
| Sil-PAzO                      | 9.40  | 1.76 | 1.28 | 4.19                   | 4.07                   | 0.87 (N) <sup>d</sup>                      |
| Sil-PAzO-ImC <sub>18</sub>    | 14.26 | 2.38 | 1.90 | 5.61                   | 5.85                   | 0.92 (N) <sup>d</sup>                      |
| Sil-P(AzO-ImC <sub>18</sub> ) | 14.22 | 2.41 | 1.73 | 6.13                   | 6.00                   | 0.84 (N) <sup>d</sup>                      |

In Sil-PAzO,  $C/N = [9.40\% - 4.42\% \times (1 - 9.40\% - 1.76\% - 1.28\%)] / 1.28\% = 4.19$

In Sil-PAzO, coverage ( $\mu\text{mol}/\text{m}^2$ ) =  $1.28\% / 14 / 4 / (1 - 9.40\% - 1.76\% - 1.28\%) / 300 = 0.87$

In Sil-PAzO-ImC<sub>18</sub>,  $C/N = [14.26\% - 4.42\% \times (1 - 14.26\% - 2.38\% - 1.90\%)] / 1.90\% = 5.61$

In Sil-PAzO-ImC<sub>18</sub>, coverage ( $\mu\text{mol}/\text{m}^2$ ) =  $1.90\% / 14 / 6 / (1 - 14.26\% - 2.38\% - 1.90\%) / 300 = 0.92$

In Sil-P(AzO-ImC<sub>18</sub>),  $C/N = [14.22\% - 4.42\% \times (1 - 14.22\% - 2.41\% - 1.73\%)] / 1.73\% = 6.13$

In Sil-P(AzO-ImC<sub>18</sub>), coverage ( $\mu\text{mol}/\text{m}^2$ ) =  $1.73\% / 14 / 6 / (1 - 14.22\% - 2.41\% - 1.73\%) / 300 = 0.84$

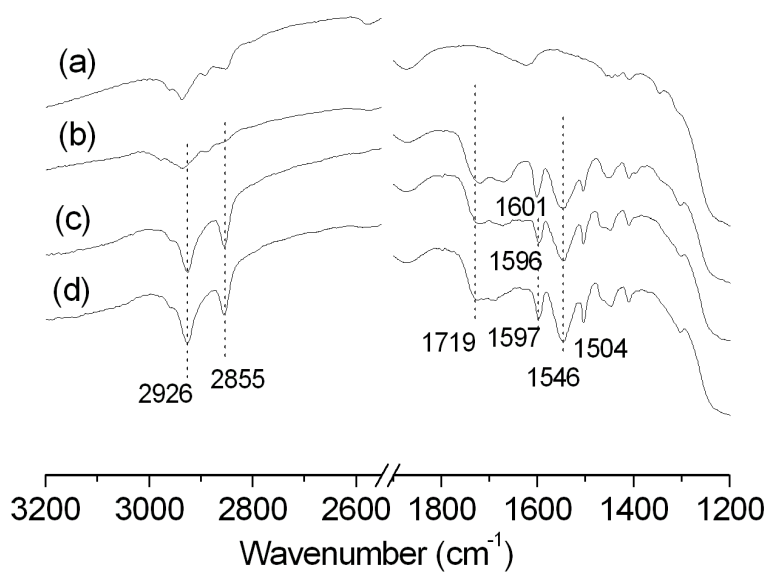

**Fig. S3** DRIFT Spectra of Sil-MPS (a), Sil-PAzO (b), Sil-PAzO-ImC<sub>18</sub> (c), and Sil-P(AzO-ImC<sub>18</sub>) (d).

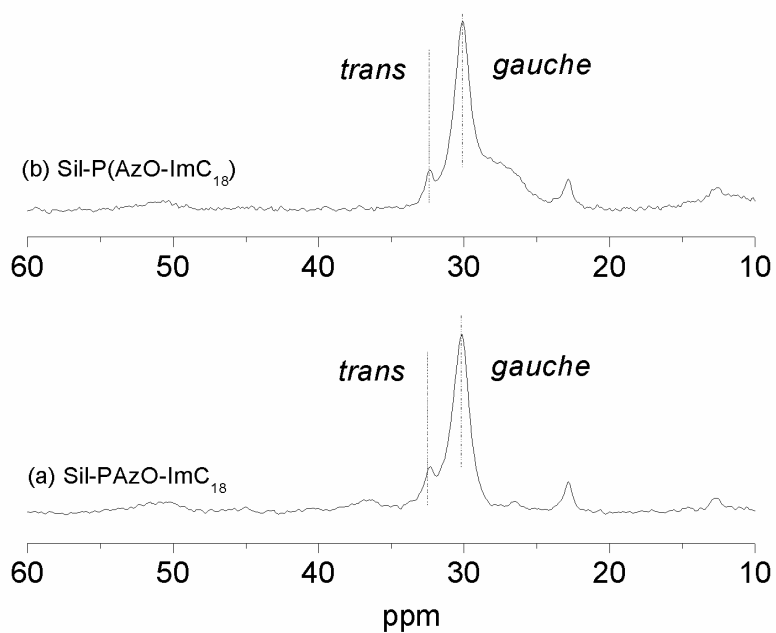

Fig. S4. Solid  $^{13}\text{C}$  NMR of Sil-PAzO-ImC<sub>18</sub> (a) and Sil-(PAzO-ImC<sub>18</sub>) (b) materials.

**Table S2.** Retention factors ( $k$ ) and separation factors ( $\alpha$ ) of *o*-, *m*-, *p*-terphenyls and triphenylene on Sil-PAzO, Sil-PAzO-ImC<sub>18</sub>, Sil-(PAzO-ImC<sub>18</sub>) and ODS columns. The chromatographic conditions were the same as in Fig. 2.

| Analytes            | Sil-PAzO |          | Sil-PAzO-ImC <sub>18</sub> |          | Sil-P(AzO-ImC <sub>18</sub> ) |          | ODS  |          |
|---------------------|----------|----------|----------------------------|----------|-------------------------------|----------|------|----------|
|                     | $k$      | $\alpha$ | $k$                        | $\alpha$ | $k$                           | $\alpha$ | $k$  | $\alpha$ |
| <i>o</i> -Terphenyl | 1.71     | -        | 0.64                       | -        | 0.67                          | -        | 3.04 | -        |
| <i>m</i> -Terphenyl | 2.80     | 1.64     | 1.24                       | 1.95     | 1.25                          | 1.87     | 4.45 | 1.46     |
| <i>p</i> -Terphenyl | 2.97     | 1.06     | 1.52                       | 1.23     | 1.52                          | 1.22     | 4.55 | 1.02     |
| Triphenylene        | 4.17     | 1.40     | 2.54                       | 1.67     | 2.50                          | 1.65     | 4.78 | 1.05     |

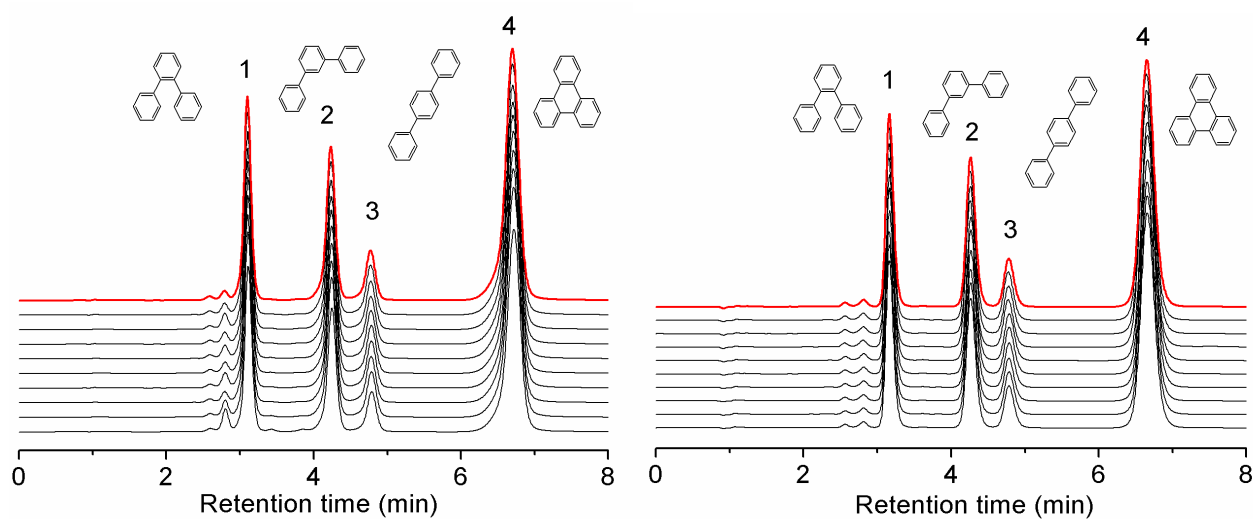

**Fig. S5** The overlapped chromatograms at the separation of *o*-terphenyl, *m*-terphenyl, *p*-terphenyl, triphenylene for (a) Sil-PAzO-ImC<sub>18</sub> and (b) Sil-P(AzO-ImC<sub>18</sub>) columns using 90% methanol as mobile phase at 10 °C. The mixture was injected 10 times continuously. The RSD values (n = 10) of the retention factors of the analytes were 0.18-0.39% for (a) and 0.24-0.35% for (b).
